# Supplementary material for: Graphene growth controlled by the position and number of layers (n = 0, 1, and more than 2) using Ni and MgO patterned ultra-flat Cu foil
Source: Royal Society of Chemistry journal article supplement (doi:10.1039/c7ra09305e), 2017-01-01

## **Position and number of layer ( $n = 0, 1$ , and more than 2) controlled graphene growth using Ni and MgO patterned ultra-flat Cu foil**

Aram Lee<sup>1,#</sup>, Kyoung Soon Choi<sup>2,#</sup>, Jinheon Park<sup>1</sup>, Tae Soo Kim<sup>1</sup>, Jouhahn Lee<sup>2</sup>, Jae-Young Choi<sup>3,\*</sup>, and Hak Ki Yu<sup>1,\*</sup>

<sup>1</sup>Department of Materials Science and Engineering and Department of Energy Systems Research, Ajou University, Suwon 16499, Korea

<sup>2</sup>The Advanced Nano Surface Research group, Korea Basic Science Institute, Daejeon 34133, Korea

<sup>3</sup>School of Advanced Materials Science & Engineering, Sungkyunkwan University, Suwon, 16419, Korea

#These authors contributed equally to this work.

### **CORRESPONDING AUTHOR FOOTNOTE**

Tel: +82(0)31-219-1680, FAX: +82(0)31-219-1613,

E-mail: hakkiyu@ajou.ac.kr, jy.choi@skky.edu

**Supplementary Information S1.** (a) CVD process for graphene growth on Ni-patterned peeled-off Cu foil: step 1 (S1) is the heating stage with H<sub>2</sub> ambient; step 2 (S2) is the methane insertion stage; and step 3 (S3) is the cooling stage. (b) OM images of patterned n-graphene, which was grown at 950 °C, transferred to SiO<sub>2</sub> (200 nm)/Si (100) substrate. (c) Scanning electron microscope image of graphene grown on Ni-patterned peeled-off Cu surface at 900 °C. Due to low solubility of carbon, all graphene grains are disconnected with each other, resulting in island growth.

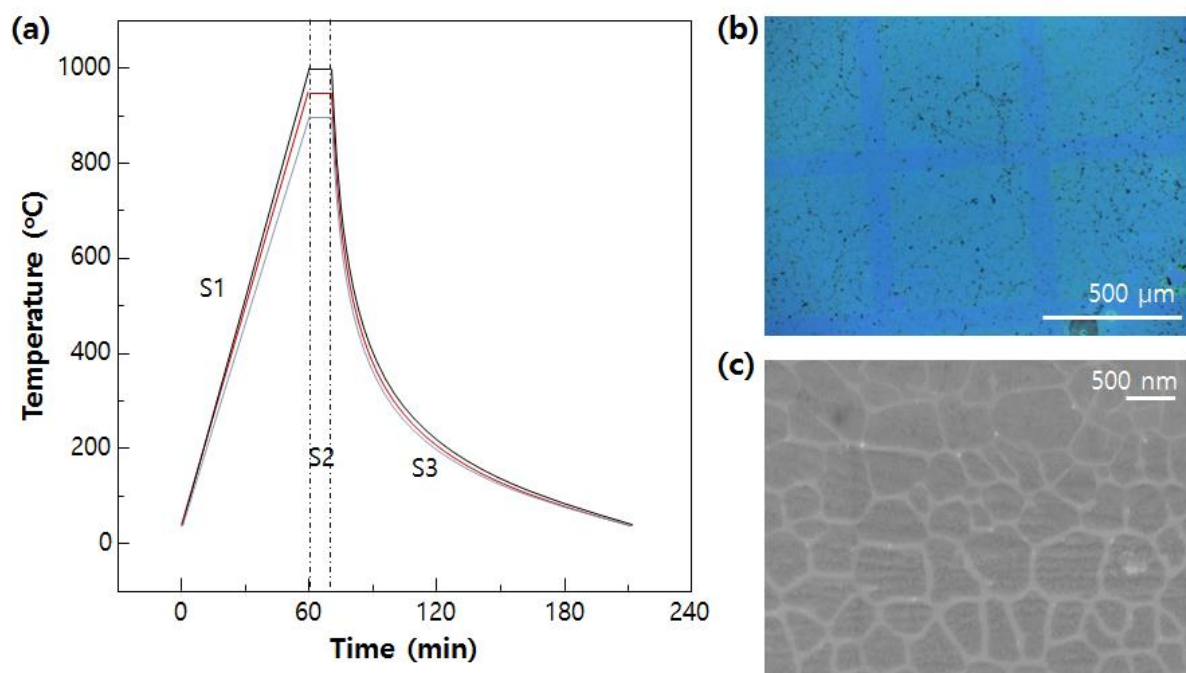

Supplement: c7ra09305e1.pdf [file c7ra09305e1.pdf]
